# Supplementary material
Source: publisher figshare collection journal article supplement (https://acs.figshare.com/ndownloader/files/4642015)
Supplement: Supplementary file 1 [file 4642015]

Repeatability and Reproducibility for SPE Separations of Commercial Australian Wine.\*

|            | <b>Repeatability<sup>a</sup></b> |       |       | <b>Reproducibility<sup>b</sup></b> |       |       |
|------------|----------------------------------|-------|-------|------------------------------------|-------|-------|
|            | <i>Total HPLC area at 280</i>    |       |       | <i>Total HPLC area at 280</i>      |       |       |
|            | <i>nm</i>                        |       |       | <i>nm</i>                          |       |       |
|            | F1                               | F2    | F3    | F1                                 | F2    | F3    |
| <b>Ave</b> | 52110                            | 39659 | 35612 | 48524                              | 32193 | 43472 |
| <b>SD</b>  | 1292                             | 973   | 1047  | 2517                               | 1969  | 991   |
| <b>CV</b>  | 2%                               | 2%    | 3%    | 5%                                 | 6%    | 2%    |

\* Two different commercial 2004 Australian Shiraz wines were used for repeatability and reproducibility studies.

<sup>a</sup> Statistics for 7 replicate separations.

<sup>b</sup> Statistics for 3 replicate separations.
